# Supplementary material for: A cancer cell-specific benzoxadiazole-based fluorescent probe for hydrogen sulfide detection in mitochondria
Source: Royal Society of Chemistry journal article supplement (doi:10.1039/d0dt03653f), 2021-01-01
Supplement: d0dt03653f1.pdf [file d0dt03653f1.pdf]

## Supporting Information

### **Cancer Cell-Specific Benzoxadiazole-based Fluorescent Probe for Hydrogen Sulfide Detection in Mitochondria**

Maxine Mambo Fortibui,<sup>1</sup> Dae Wui Yoon,<sup>3</sup> Ja-Yun Lim,<sup>2</sup> Sohyun Lee,<sup>1</sup> Minsun Choi,<sup>1</sup> June Seok Heo,<sup>2</sup> Jinkwan Kim,<sup>3\*</sup> Jinheung Kim<sup>1\*</sup>

*<sup>1</sup>Department of Chemistry and Nano Science,  
Ewha Womans University, Seoul 120-750, Korea*

*<sup>2</sup>Department of Integrated Biomedical and Life Sciences, College of Health Science, Korea  
University, Seoul 03722, Republic of Korea*

*<sup>3</sup>Department of Biomedical Laboratory Science, College of Health Science, Jungwon University,  
Chung-buk 28024, Republic of Korea*

[\*\*] This work was supported by the National Research Foundation (NRF) grant funded by the Korean government (NRF-2017R1A5A1015365, 2019R1A2C1007278), “Next Generation Carbon Upcycling Project” (Project No. 2017M1A2A2042517 to J. Kim) through the NRF funded by the Ministry of Science and ICT.

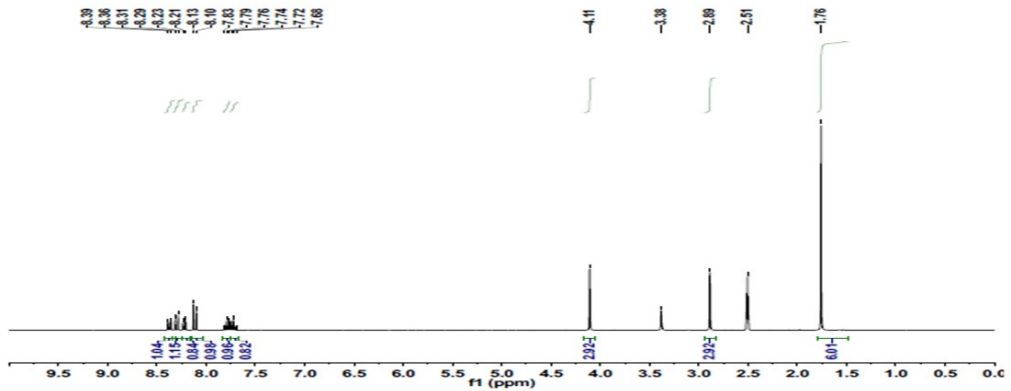

Figure S1.  $^1\text{H-NMR}$  of compound **1a** in  $\text{DMSO-}d_6$ .

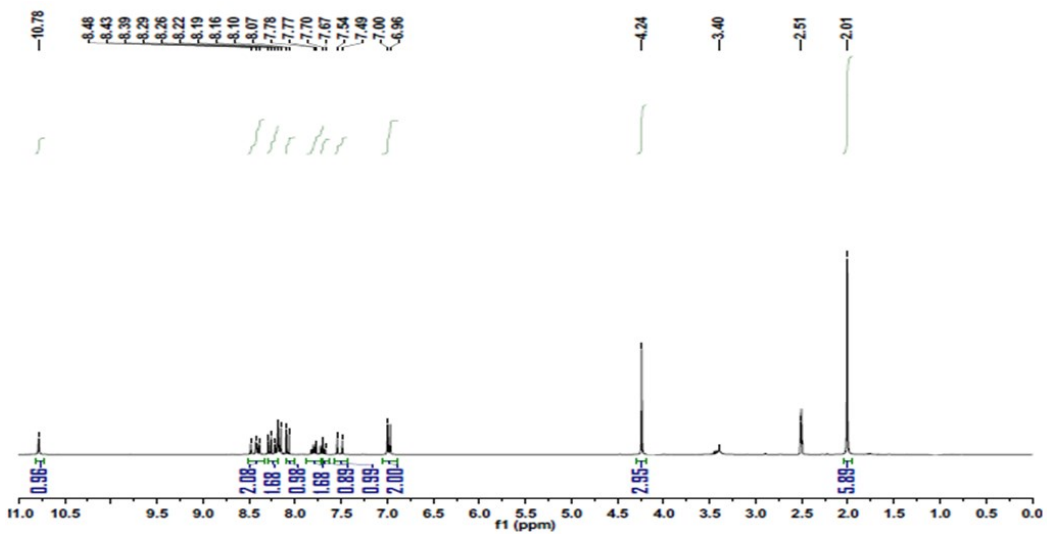

Figure S2.  $^1\text{H-NMR}$  of compound **1b** in  $\text{DMSO-}d_6$ .

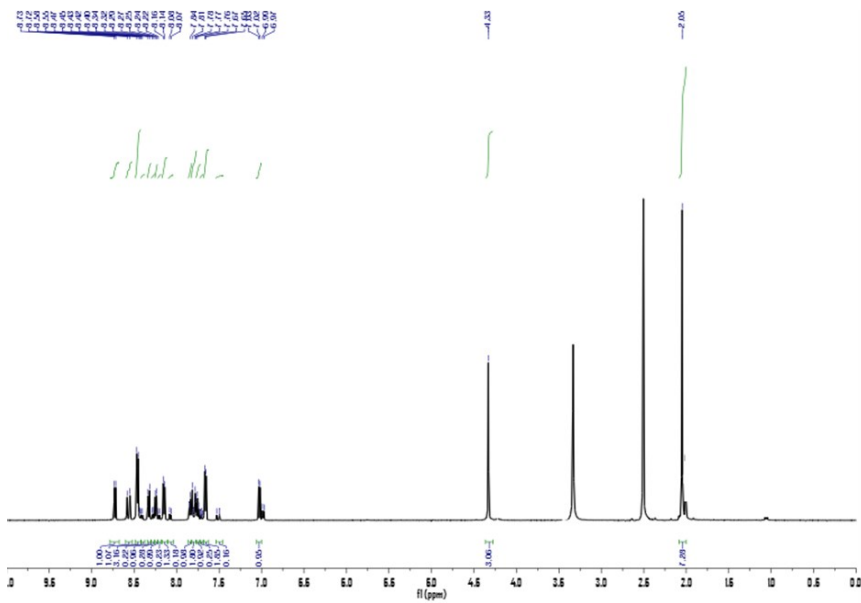

**Figure S3.**  $^1\text{H}$ -NMR of probe **1** in  $\text{DMSO-}d_6$ . The solvent peaks appeared at ppm.

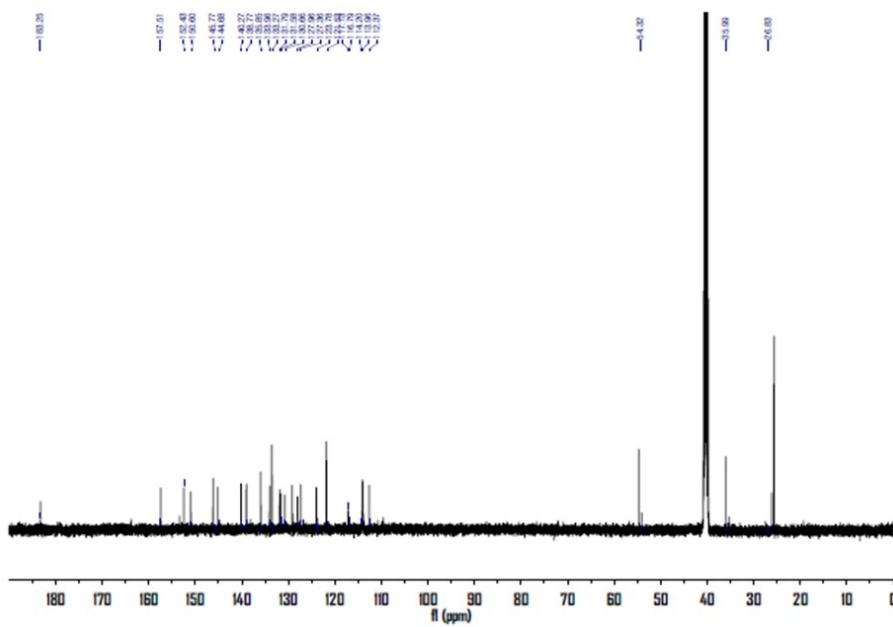

**Figure S4.**  $^{13}\text{C}$ -NMR of probe **1** in  $\text{DMSO-}d_6$ . The peaks at 40 ppm derived from solvent.

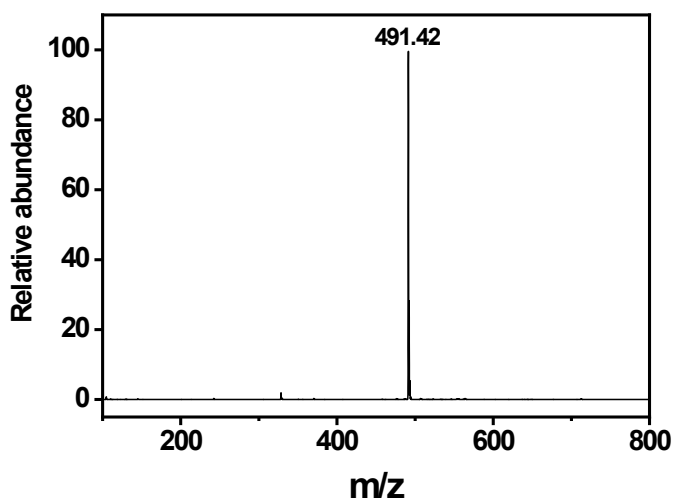

**Figure S5.** The electrospray ionization spectrum of probe **1** affords the peaks at  $m/z = 491.42$ , indicating  $[1 - I]^+$ . The calculated mass of  $[1 - I]^+$  is 491.52.

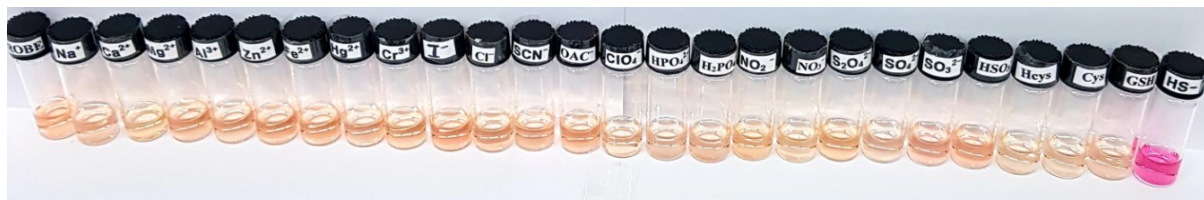

**Figure S6.** Colorimetric changes of probe **1** upon the addition of various analytes and NaHS

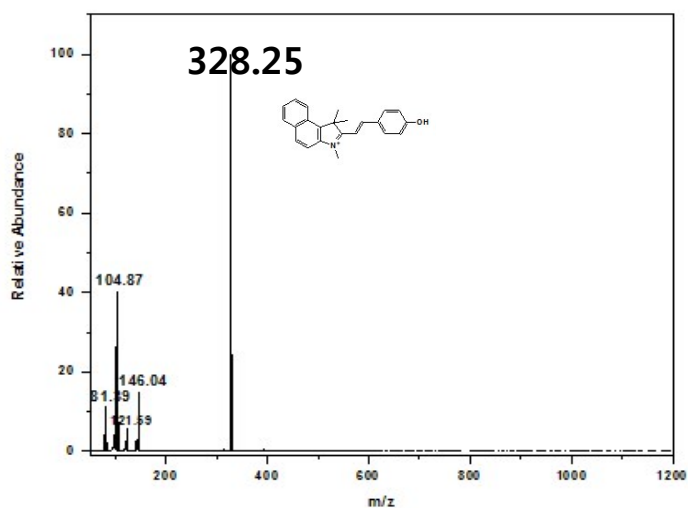

**Figure S7.** The electrospray ionization spectrum of probe **1** after treatment with hydrogen sulfide. It affords the peaks at  $m/z = 328.25$ , indicating  $[\mathbf{1b} - \text{I}]^+$ .

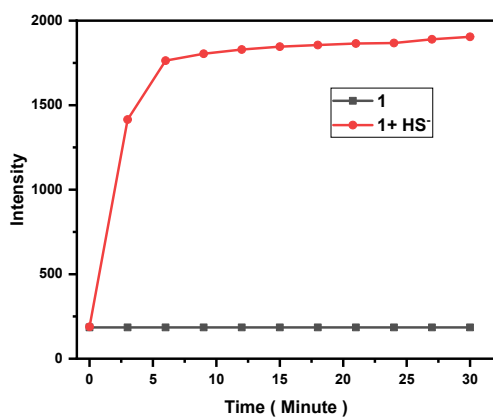

**Figure S8.** Time course experiment of probe **1** (10  $\mu\text{M}$ ) reacting with NaHS (100  $\mu\text{M}$ ) at 25  $^{\circ}\text{C}$  in PBS (10 mM, pH 7.4)/CH<sub>3</sub>CN (v/v, 99/1).  $\lambda_{\text{ex}} = 545 \text{ nm}$ .
